# Supplementary material for: Insecticidal Activity of Tannins from Selected Brown Macroalgae against the Cotton Leafhopper Amrasca devastans
Source: MDPI journal article supplement (doi:10.3390/plants12183188), 2023-09-06
Supplement: s1 [file s1]

# Supplementary Materials

**Table S1.** Insecticidal activity of crude tannin extracts of *S. wightii*, *S. polypodioides* and *T. ornata* (0.025, 0.05, 0.1 and 0.2%), standards (gallic acid and tannic acid) (0.025, 0.05, 0.1 and 0.2%) and commercial insecticides (Vijayneem and Monocrotophos-0.03%) on *A. devastans* nymphs and adults (male/female at random) mortality (%) after 96 h exposure on the basis of oral and contact toxicity bioassays (n = 25, x ± SE).

| Seaweeds                | Concentrations (%) | Adults                  |                          | Nymphs                   |                         |
|-------------------------|--------------------|-------------------------|--------------------------|--------------------------|-------------------------|
|                         |                    | Oral toxicity           | Contact toxicity         | Oral toxicity            | Contact toxicity        |
| <i>S. wightii</i>       | 0.025              | 28.0±4.9 <sup>cB</sup>  | 32.0±8.0 <sup>cdA</sup>  | 16.0±4.0 <sup>dB</sup>   | 20.0±6.3 <sup>dA</sup>  |
|                         | 0.05               | 44.0±7.5 <sup>bA</sup>  | 40.0±8.9 <sup>cB</sup>   | 32.0±10.2 <sup>cB</sup>  | 44.0±4.0 <sup>cA</sup>  |
|                         | 0.1                | 64.0±7.5 <sup>aA</sup>  | 60.0±8.9 <sup>bB</sup>   | 56.0±7.5 <sup>bA</sup>   | 56.0±4.0 <sup>bA</sup>  |
|                         | 0.2                | 64.0±7.5 <sup>aB</sup>  | 88.0±4.9 <sup>aA</sup>   | 76.0±4.0 <sup>aAB</sup>  | 80.0±6.3 <sup>aA</sup>  |
| <i>S. polypodioides</i> | 0.025              | 36.0±7.5 <sup>dB</sup>  | 40.0±10.9 <sup>cdA</sup> | 24.0±9.0 <sup>dA</sup>   | 16.0±4.9 <sup>daB</sup> |
|                         | 0.05               | 56.0±4.0 <sup>cA</sup>  | 44.0±7.4 <sup>cB</sup>   | 52.0±10.2 <sup>bcA</sup> | 40.0±6.3 <sup>cB</sup>  |
|                         | 0.1                | 76.0±7.5 <sup>bA</sup>  | 68.0±4.9 <sup>bB</sup>   | 56.0±4.0 <sup>bA</sup>   | 56.0±9.9 <sup>bA</sup>  |
|                         | 0.2                | 88.0±4.9 <sup>aA</sup>  | 84.0±7.5 <sup>aAB</sup>  | 76.0±4.0 <sup>aA</sup>   | 60.0±14.2 <sup>aB</sup> |
| <i>T. ornata</i>        | 0.025              | 28.0±8.0 <sup>bD</sup>  | 40.0±0.1 <sup>dA</sup>   | 36.0±11.7 <sup>dA</sup>  | 12.0±4.9 <sup>dB</sup>  |
|                         | 0.05               | 44.0±7.5 <sup>bC</sup>  | 60.0±0.1 <sup>cA</sup>   | 56.0±7.5 <sup>cA</sup>   | 36.0±7.5 <sup>cB</sup>  |
|                         | 0.1                | 68.0±4.9 <sup>bB</sup>  | 72.0±10.2 <sup>abA</sup> | 60.0±1.2 <sup>bA</sup>   | 52.0±4.9 <sup>bB</sup>  |
|                         | 0.2                | 80.0±9.0 <sup>aA</sup>  | 80.0±6.3 <sup>aA</sup>   | 72.0±4.0 <sup>aA</sup>   | 60.0±6.3 <sup>aB</sup>  |
| Gallic acid             | 0.025              | 36.0±4.0 <sup>aD</sup>  | 36.0±3.9 <sup>dA</sup>   | 32.0±1.8 <sup>dA</sup>   | 20.0±6.3 <sup>dB</sup>  |
|                         | 0.05               | 56.0±9.8 <sup>cA</sup>  | 54.0±7.5 <sup>cAB</sup>  | 56.0±7.5 <sup>cA</sup>   | 44.0±4.0 <sup>cB</sup>  |
|                         | 0.1                | 68.0±4.9 <sup>abA</sup> | 64.0±7.5 <sup>bB</sup>   | 72.0±8.0 <sup>abA</sup>  | 64.0±7.4 <sup>bB</sup>  |
|                         | 0.2                | 72.0±2.0 <sup>aB</sup>  | 84.0±11.7 <sup>aA</sup>  | 76.0±9.8 <sup>aB</sup>   | 80.0±6.3 <sup>aA</sup>  |
| Tannic acid             | 0.025              | 36.0±7.5 <sup>cdA</sup> | 32.0±12.0 <sup>dB</sup>  | 28.0±4.9 <sup>dA</sup>   | 28.0±4.9 <sup>dA</sup>  |
|                         | 0.05               | 44.0±7.5 <sup>cB</sup>  | 48.0±4.9 <sup>cA</sup>   | 40.0±2.6 <sup>cB</sup>   | 48.0±4.9 <sup>cA</sup>  |
|                         | 0.1                | 60.0±9.0 <sup>bA</sup>  | 56.0±7.5 <sup>bB</sup>   | 64.0±3.2 <sup>bA</sup>   | 56.0±7.5 <sup>bB</sup>  |
|                         | 0.2                | 76.0±7.5 <sup>aA</sup>  | 72.0±3.8 <sup>aB</sup>   | 80.0±0.9 <sup>aA</sup>   | 76.0±7.5 <sup>aAB</sup> |
| Vijayneem               | 0.03               | 60.0±6.3 <sup>aA</sup>  | 52.0±4.9 <sup>aB</sup>   | 52.0±4.9 <sup>aA</sup>   | 56.0±7.5 <sup>aA</sup>  |
| Monocrotophos           | 0.03               | 84.0±4.0 <sup>aA</sup>  | 72.0±5.7 <sup>bB</sup>   | 80.0±8.9 <sup>aA</sup>   | 80.0±6.3 <sup>aA</sup>  |

The same lowercase letters in a column for each plants and standards separately indicate no significant difference in the Tukey test ( $P < 0.05$ ). The same uppercase letters indicate no significant difference in the Tukey test ( $P < 0.05$ ) between oral and contact toxicity bioassays of adults and nymphs separately.

**Table S2.** Impact of tannin fractions (F1 Rf—0.86 and F2 Rf—0.88) of *S. wightii*, *S. polypodioides* and *T. ornata*; standards (gallic acid/tannic acid) (0.0075, 0.015, 0.03, 0.06 and 0.12%) and commercial insecticides (Vijayneem/Monocrotophos-0.03%) on *A. devastans* adult (male/female at random) mortality (%) after 96 h exposure during oral and contact toxicity bioassays (n = 30, x ± SE).

| Seaweeds extract /tannin standards | Concentrations | Oral toxicity—adult     |                          | Contact toxicity—adult  |                          |
|------------------------------------|----------------|-------------------------|--------------------------|-------------------------|--------------------------|
|                                    |                | Fraction 1              | Fraction 2               | Fraction 1              | Fraction 2               |
| <i>S. wightii</i>                  | 0.0075         | 46.7±4.1 <sup>dA</sup>  | 30.0±8.6 <sup>eB</sup>   | 33.3±12.3 <sup>eB</sup> | 40.0±10.3 <sup>deA</sup> |
|                                    | 0.015          | 70.0±6.8 <sup>cA</sup>  | 46.7±9.9 <sup>dB</sup>   | 40.0±7.3 <sup>dB</sup>  | 43.3±8.0 <sup>dA</sup>   |
|                                    | 0.03           | 76.7±8.0 <sup>bcA</sup> | 63.3±14. <sup>bcB</sup>  | 60.0±5.2 <sup>bcA</sup> | 60.0±8.9 <sup>bcA</sup>  |
|                                    | 0.06           | 76.7±6.1 <sup>bcA</sup> | 66.7±6.7 <sup>bB</sup>   | 63.3±6.1 <sup>bA</sup>  | 63.3±6.2 <sup>bA</sup>   |
|                                    | 0.12           | 83.3±6.1 <sup>aB</sup>  | 90.0±4.5 <sup>aA</sup>   | 73.3±8.4 <sup>aB</sup>  | 76.7±10.8 <sup>aA</sup>  |
| <i>S. polypodioides</i>            | 0.0075         | 30.0±8.7 <sup>eB</sup>  | 36.7±3.3 <sup>eA</sup>   | 23.3±8.0 <sup>eB</sup>  | 36.7±8.0 <sup>deA</sup>  |
|                                    | 0.015          | 60.0±5.2 <sup>cdA</sup> | 43.3±6.1 <sup>dB</sup>   | 40.0±7.3 <sup>dB</sup>  | 43.3±6.1 <sup>dA</sup>   |
|                                    | 0.03           | 63.3±9.5 <sup>bcA</sup> | 60.0±7.3 <sup>cB</sup>   | 53.3±6.7 <sup>bcB</sup> | 60.0±5.2 <sup>bcA</sup>  |
|                                    | 0.06           | 66.7±2.3 <sup>bB</sup>  | 76.7±8.0 <sup>bA</sup>   | 56.7±3.3 <sup>bB</sup>  | 63.3±8.0 <sup>abA</sup>  |
|                                    | 0.12           | 83.3±8.0 <sup>aB</sup>  | 86.7±5.3 <sup>aA</sup>   | 66.7±6.7 <sup>aB</sup>  | 70.0±6.8 <sup>aA</sup>   |
| <i>T. ornata</i>                   | 0.0075         | 40.0±5.2 <sup>dB</sup>  | 43.3±8.0 <sup>dA</sup>   | 30.0±8.6 <sup>dB</sup>  | 46.7±4.2 <sup>dA</sup>   |
|                                    | 0.015          | 40.0±5.7 <sup>dB</sup>  | 50.0±12.4 <sup>cdA</sup> | 43.3±8.0 <sup>cB</sup>  | 50.0±4.5 <sup>cA</sup>   |
|                                    | 0.03           | 60.0±7.3 <sup>cA</sup>  | 53.3±6.7 <sup>cB</sup>   | 50.0±8.6 <sup>bB</sup>  | 53.3±6.7 <sup>cA</sup>   |
|                                    | 0.06           | 76.7±6.1 <sup>bA</sup>  | 60.0±5.2 <sup>bB</sup>   | 50.0±10.0 <sup>bB</sup> | 63.3±8.0 <sup>bA</sup>   |
|                                    | 0.12           | 80.0±7.3 <sup>aA</sup>  | 83.3±6.1 <sup>aA</sup>   | 63.3±8.0 <sup>aB</sup>  | 70.0±10.0 <sup>aA</sup>  |
| Gallic acid                        | 0.0075         | 30.0±8.6 <sup>e</sup>   |                          | 43.3±8.0 <sup>de</sup>  |                          |
|                                    | 0.015          | 43.3±1.8 <sup>cd</sup>  |                          | 46.7±6.7 <sup>d</sup>   |                          |
|                                    | 0.03           | 53.3±6.7 <sup>c</sup>   |                          | 53.3±6.7 <sup>bc</sup>  |                          |
|                                    | 0.06           | 73.3±6.7 <sup>b</sup>   |                          | 56.7±14.1 <sup>b</sup>  |                          |
|                                    | 0.12           | 83.3±6.1 <sup>a</sup>   |                          | 73.3±8.4 <sup>a</sup>   |                          |
| Tannic acid                        | 0.0075         | 26.7±8.4 <sup>d</sup>   |                          | 40.0±8.9 <sup>cd</sup>  |                          |
|                                    | 0.015          | 46.4±6.7 <sup>c</sup>   |                          | 46.7±6.7 <sup>bc</sup>  |                          |
|                                    | 0.03           | 56.7±6.1 <sup>b</sup>   |                          | 53.3±4.2 <sup>bc</sup>  |                          |
|                                    | 0.06           | 73.3±9.9 <sup>a</sup>   |                          | 56.7±6.1 <sup>b</sup>   |                          |
|                                    | 0.12           | 73.3±8.4 <sup>a</sup>   |                          | 66.7±6.7 <sup>a</sup>   |                          |
| Vijayneem                          | 0.03           | 60.0±5.2 <sup>a</sup>   |                          | 56.7±12.0 <sup>a</sup>  |                          |
| Monocrotophos                      | 0.03           | 80.0±5.2 <sup>a</sup>   |                          | 60.0±8.9 <sup>a</sup>   |                          |

The same lowercase letters in a column for each plants and standards separately indicate no significant difference in the Tukey test ( $P < 0.05$ ). The same uppercase letters indicate no significant difference in the Tukey test ( $P < 0.05$ ) between F1 and F2 of oral and contact toxicity bioassays of adults and nymphs separately.

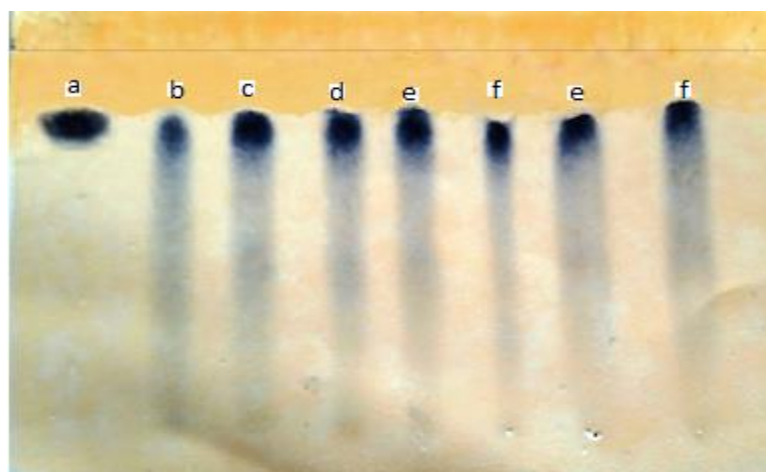

**Figure S1.** Photograph showing the TLC analysis of the standards (a) gallic acid, (b) tannic acid, (c) *S. wightii* F1, (d) *S. polypodioides* F1, (e) *T. ornata* F1, (f) *S. wightii* F2, (g) *S. polypodioides* F2 and (h) *T. ornata* F2. Tannic and gallic acids were processed in TLC 10 times, and samples were processed three times in TLC.

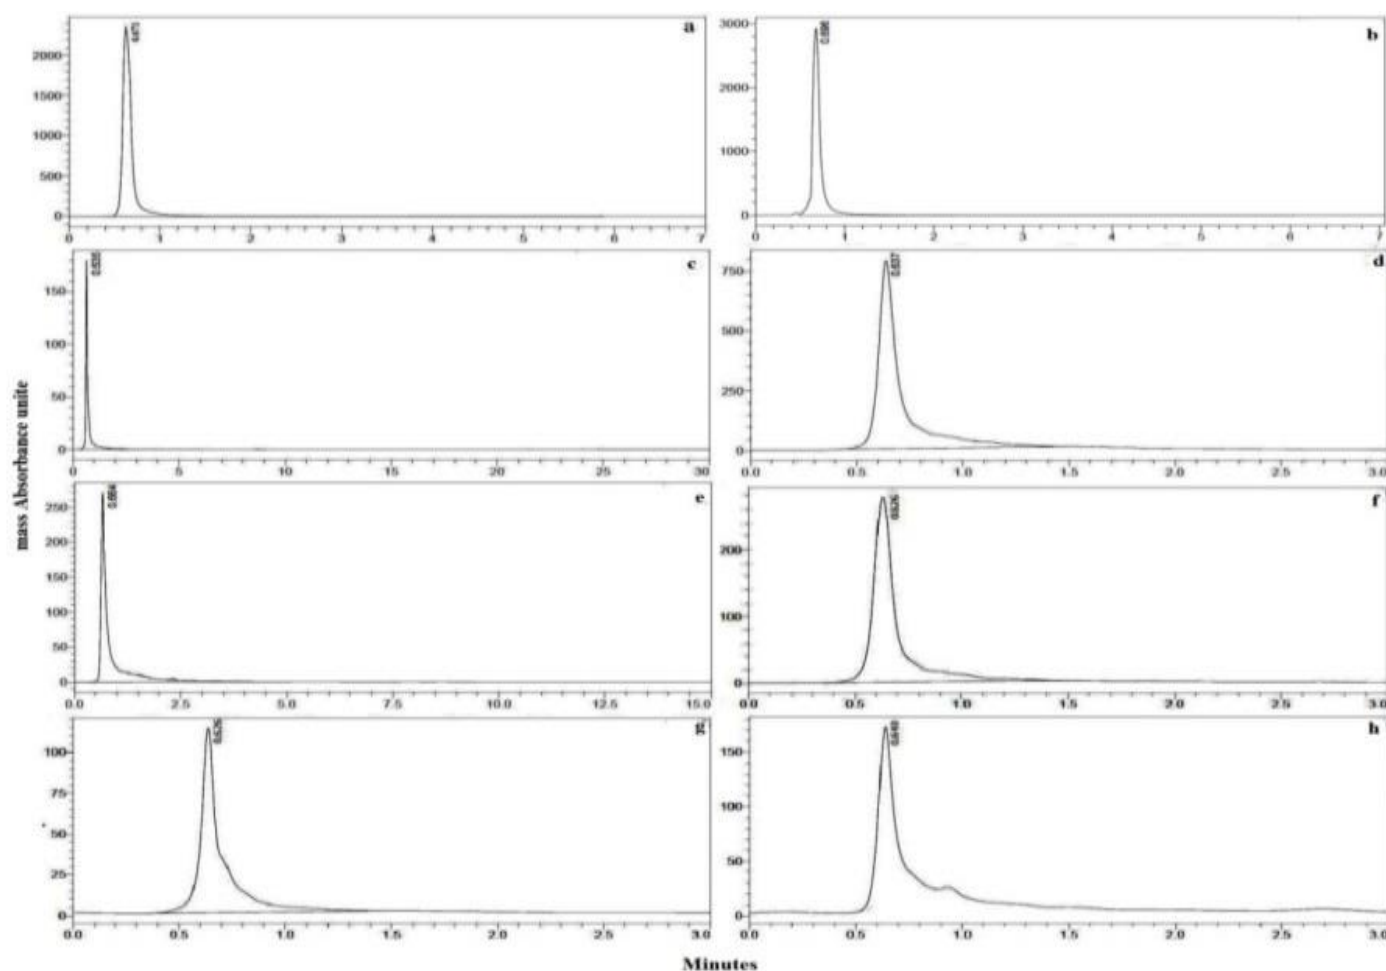

**Figure S2.** HPLC analysis of standard gallic acid (a) and tannic acid (b), and crude tannin extracted from *S. wightii* (c), *S. polypodioides* (d) and *T. ornata* (e) using the Soxhlet method and *S. wightii* (f), *S. polypodioides* (g) and *T. ornata* (h) using the cold percolation method.

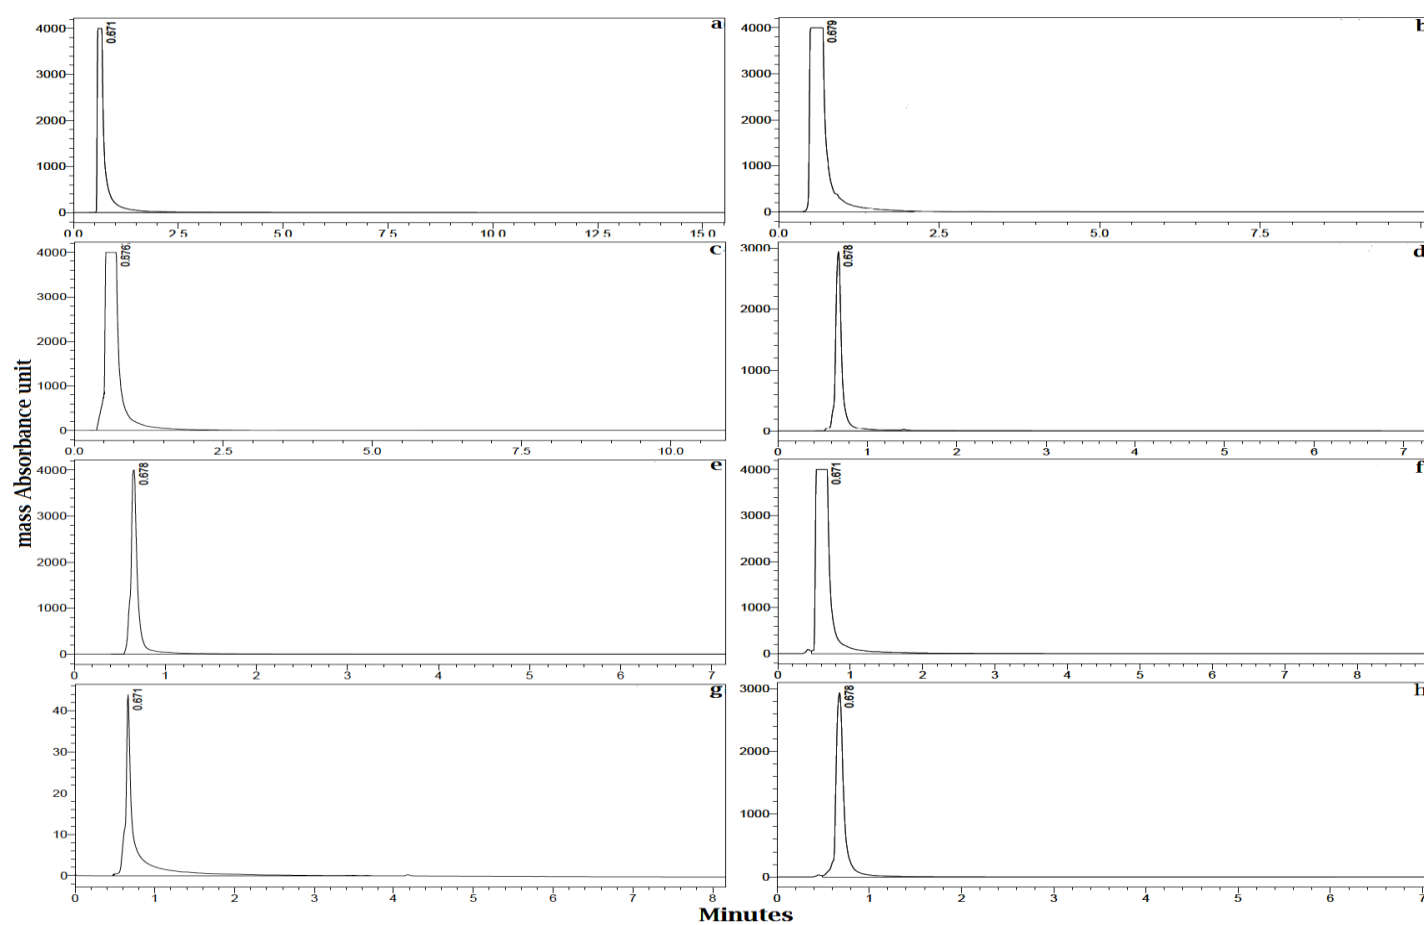

**Figure S3.** HPLC analysis of gallic acid (a) and tannic acid (b), and brown algae *S. wightii* F1(c), *S. wightii* F2 (d), *S. polypodioides* F1 (e), *S. polypodioides* F2 (f), *T. ornata* F1 (g) and *T. ornata* F2 (h).

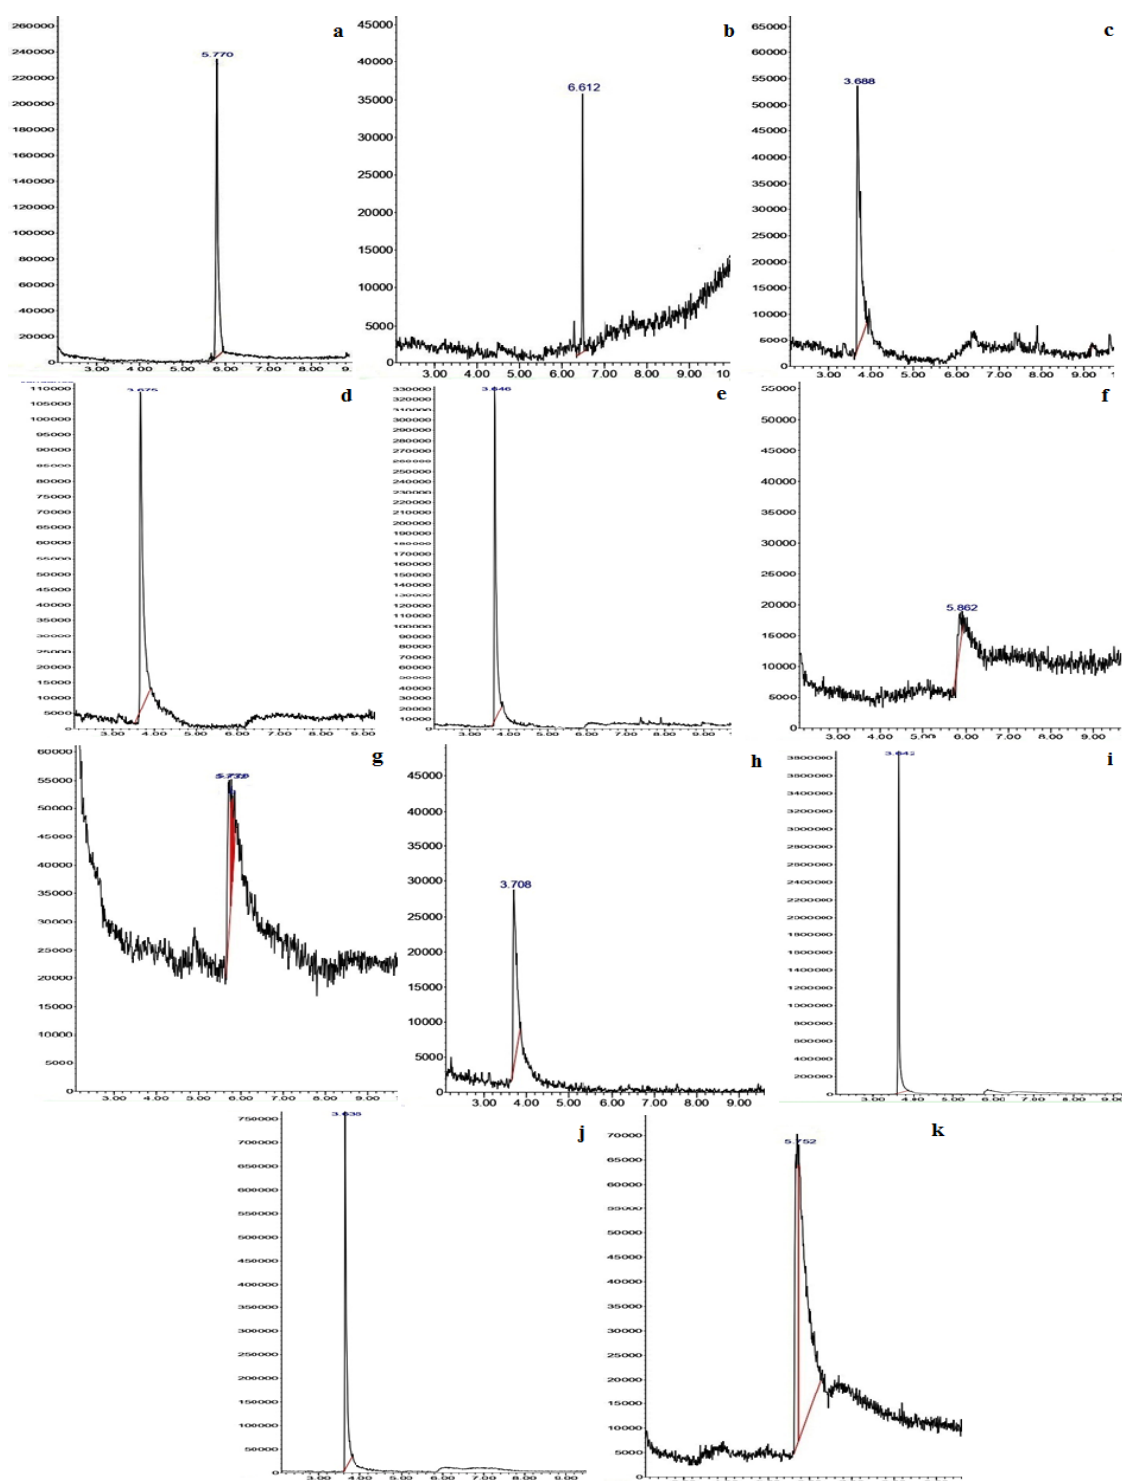

**Figure S4.** GC-MS analysis of gallic acid (a) and tannic acid (b), and drifted brown seaweed tannin crude extracts *S. wightii* (c), *S. polypodioides* (d) and *T. ornata* (e), *S. wightii* F1 (f), *S. polypodioides* F1 (g), *T. ornata* F1 (h), *S. wightii* F2 (i), *S. polypodioides* F2 (j) and *T. ornata* F2 (k).

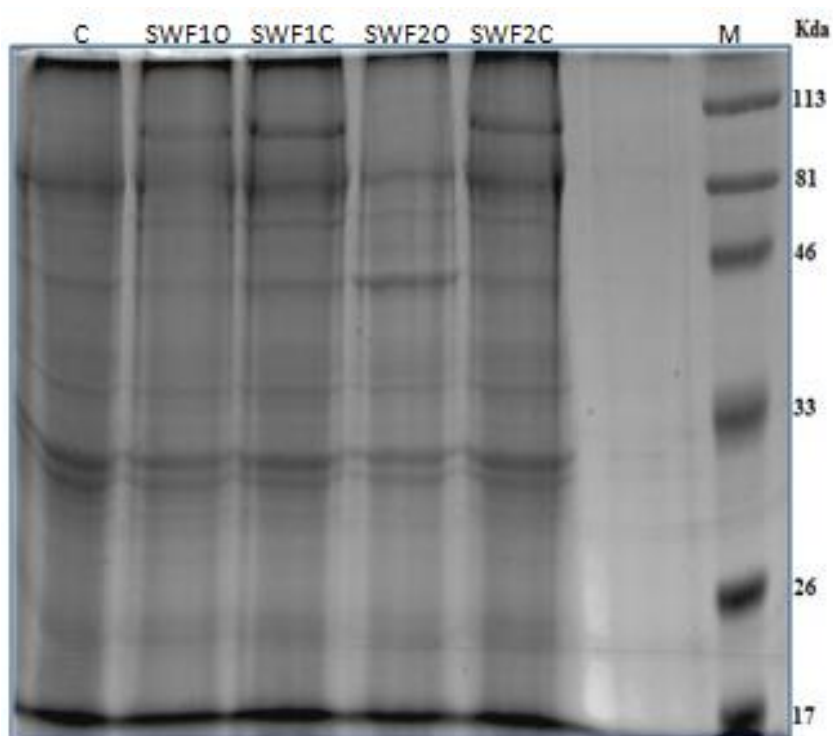

**Figure S5.** Effects of  $LC_{50}$  concentrations of seaweed tannin fractions on whole-body protein SDS-PAGE of *A. devastans* adults. C—control; SWF1O—*S.wightii* tannin F1 (oral toxicity); SWF2C—*S. wightii* tannin F1 (contact toxicity); SWF2O—*S. wightii* tannin F2 (oral toxicity); SWF2C—*S. wightii* tannin F2 (contact toxicity); and M—marker.
